# Supplementary material for: Healthcare Provider’s Perceived Self-Efficacy in HPV Vaccination Hesitancy Counseling and HPV Vaccination Acceptance
Source: MDPI journal article supplement (doi:10.3390/vaccines11020300), 2023-01-30
Supplement: s1 [file s1]

**Supplementary Table S1.** Descriptive statistics of the overall population of HCPs (N = 1283).

| <b>HCP Characteristics</b>             | <b>n (%)</b> |
|----------------------------------------|--------------|
| <b>Provider age, years<sup>a</sup></b> |              |
| < 35                                   | 160 (12.7)   |
| 35-54                                  | 783 (62.2)   |
| ≥ 55                                   | 316 (25.1)   |
| <b>Sex</b>                             |              |
| Female                                 | 966 (76.5)   |
| Male                                   | 297 (23.5)   |
| <b>Race/Ethnicity</b>                  |              |
| Non-Hispanic White                     | 668 (53.3)   |
| Non-Hispanic Black                     | 116 (9.3)    |
| Hispanic                               | 164 (13.1)   |
| Non-Hispanic Other                     | 306 (24.4)   |
| <b>Practice location</b>               |              |
| Rural                                  | 54 (4.2)     |
| Urban                                  | 1228 (95.8)  |
| <b>Provider type</b>                   |              |
| Physician                              | 501 (39.1)   |
| Nurse                                  | 407 (31.7)   |
| Physician Assistant                    | 273 (21.3)   |
| Other                                  | 102 (8.0)    |
| <b>Type of practice</b>                |              |
| University/Teaching hospital           | 398 (31.0)   |
| Solo practice                          | 144 (11.2)   |
| Group practice                         | 407 (31.7)   |
| FQHC/Public facility                   | 132 (10.3)   |
| Other                                  | 202 (15.7)   |
| <b>Years in practice</b>               |              |
| ≤ 10 years                             | 492 (38.7)   |
| 11-20 years                            | 434 (34.2)   |
| > 20 years                             | 344 (27.1)   |
| <b>No of patients seen (per week)</b>  |              |
| ≤ 50                                   | 608 (48.8)   |
| 51-100                                 | 486 (39.0)   |
| > 100                                  | 153 (12.3)   |
| <b>Type of patients seen</b>           |              |
| Both adults and children               | 614 (47.9)   |
| Only Adults                            | 404 (31.4)   |
| Only children                          | 265 (20.7)   |

<sup>a</sup>Mean (SD) provider age: 47.1 (11.3).

SD = Standard deviation.

Missing observations: age, 24; sex, 20; practice location, 1; race/ethnicity, 29; years in practice, 13; number of patients seen per week, 36.
